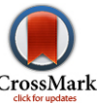

# Triglycerides in the Human Kidney Cortex: Relationship with Body Size

Ion Alexandru Bobulescu<sup>1\*</sup>, Yair Lotan<sup>2</sup>, Jianning Zhang<sup>3</sup>, Tara R. Rosenthal<sup>3</sup>, John T. Rogers<sup>3</sup>, Beverley Adams-Huet<sup>4</sup>, Khashayar Sakhaee<sup>1</sup>, Orson W. Moe<sup>5</sup>

**1** Department of Internal Medicine and the Charles and Jane Pak Center for Mineral Metabolism and Clinical Research, University of Texas Southwestern Medical Center, Dallas, Texas, United States of America, **2** Department of Urology, University of Texas Southwestern Medical Center, Dallas, Texas, United States of America, **3** Department of Internal Medicine, University of Texas Southwestern Medical Center, Dallas, Texas, United States of America, **4** Department of Clinical Sciences and the Charles and Jane Pak Center for Mineral Metabolism and Clinical Research, University of Texas Southwestern Medical Center, Dallas, Texas, United States of America, **5** Departments of Internal Medicine, Physiology, and the Charles and Jane Pak Center for Mineral Metabolism and Clinical Research, University of Texas Southwestern Medical Center, Dallas, Texas, United States of America

## Abstract

Obesity is associated with increased risk for kidney disease and uric acid nephrolithiasis, but the pathophysiological mechanisms underpinning these associations are incompletely understood. Animal experiments have suggested that renal lipid accumulation and lipotoxicity may play a role, but whether lipid accumulation occurs in humans with increasing body mass index (BMI) is unknown. The association between obesity and abnormal triglyceride accumulation in non-adipose tissues (steatosis) has been described in the liver, heart, skeletal muscle and pancreas, but not in the human kidney. We used a quantitative biochemical assay to quantify triglyceride in normal kidney cortex samples from 54 patients undergoing nephrectomy for localized renal cell carcinoma. In subsets of the study population we evaluated the localization of lipid droplets by Oil Red O staining and measured 16 common ceramide species by mass spectrometry. There was a positive correlation between kidney cortex triglyceride content and BMI (Spearman  $R=0.27$ ,  $P=0.04$ ). Lipid droplets detectable by optical microscopy had a sporadic distribution but were generally more prevalent in individuals with higher BMI, with predominant localization in proximal tubule cells and to a lesser extent in glomeruli. Total ceramide content was inversely correlated with triglycerides. We postulate that obesity is associated with abnormal triglyceride accumulation (steatosis) in the human kidney. In turn, steatosis and lipotoxicity may contribute to the pathogenesis of obesity-associated kidney disease and nephrolithiasis.

**Citation:** Bobulescu IA, Lotan Y, Zhang J, Rosenthal TR, Rogers JT, et al. (2014) Triglycerides in the Human Kidney Cortex: Relationship with Body Size. *PLoS ONE* 9(8): e101285. doi:10.1371/journal.pone.0101285

**Editor:** Giuseppe Danilo Norata, University of Milan, Italy

**Received:** October 9, 2013; **Accepted:** June 4, 2014; **Published:** August 29, 2014

**Copyright:** © 2014 Bobulescu et al. This is an open-access article distributed under the terms of the Creative Commons Attribution License, which permits unrestricted use, distribution, and reproduction in any medium, provided the original author and source are credited.

**Funding:** This work was supported by the United States National Institutes of Health (NIH) grants K01-DK090282 (to IAB) and R01-DK081423 (to KS). OWM was supported by NIH grants R01-DK041612 and R01-DK091392, the Simmons Family Foundation, and the Charles and Jane Pak Foundation. The authors also acknowledge support from the research cores of the UT Southwestern O'Brien Kidney Research Center, supported by NIH grant P30DK-07938. The funders had no role in study design, data collection and analysis, decision to publish, or preparation of the manuscript.

**Competing Interests:** The authors have declared that no competing interests exist.

\* Email: Alexandru.Bobulescu@UTSouthwestern.edu

## Introduction

The prevalence of obesity (body mass index  $\geq 30$ ) among adults in the European Union ranges from 8% in Romania to 24% in the United Kingdom [1], exceeds 35% in the United States [2], and is approximately 11% worldwide [3]. Although body mass index (BMI) is not an ideal measure of body adiposity and associated health risk [4], multiple studies have shown that increased BMI is an independent risk factor for chronic kidney disease (CKD) and end-stage renal disease (ESRD), even after adjustment for obesity-related conditions such as hypertension and type 2 diabetes [5–7]. The mechanisms by which obesity can directly contribute to increased CKD and ESRD risk, independent of its association with hypertension and type 2 diabetes, are incompletely understood. Various non-mutually exclusive and partly overlapping mechanisms have been proposed, including inflammation, hyperfiltration, podocyte stress, oxidative stress, changes in various hormones or signaling molecules such as leptin and adiponectin, as well as renal lipid accumulation and lipotoxicity [8–11].

In addition to its association with CKD and ESRD, obesity has been linked with increased risk for kidney stones in general [12,13], and uric acid stones in particular [14,15]. While the pathophysiology of uric acid nephrolithiasis is likely multifactorial [16], animal and cell culture experiments have shown that lipid accumulation in proximal tubule cells may contribute to the urinary biochemical abnormalities that underpin uric acid stone risk [17–19].

Lipid accumulation in other organs, including skeletal muscle, myocardium, pancreas and liver, has been associated with obesity in humans [20–23], and has been implicated in cell and organ dysfunction [24–27]. Lipid accumulation in the kidney has been described in a number of animal models, but very little human data are available [8,9]. In particular, establishing whether renal lipid accumulation occurs in humans with increased BMI, thus potentially contributing to obesity-related CKD, ESRD and nephrolithiasis risk, is of fundamental importance, and there is no database on this topic. To address this knowledge gap, we measured renal triglycerides and defined their localization in

normal kidney surgical specimens obtained from patients undergoing nephrectomy, with a wide range of BMI. In addition, we measured tissue levels of 16 common ceramide species in representative samples.

## Methods

### Ethics Statement

The human study was approved by the University of Texas Southwestern Medical Center Institutional Review Board, was conducted in strict accordance with the Helsinki Declaration of 1975, as revised in 2000, and all study participants provided written informed consent prior to nephrectomy. The animal study protocol was approved by the Institutional Animal Care and Use Committee (IACUC) at University of Texas Southwestern Medical Center, and all animal work was performed in strict accordance with institutional guidelines and with the National Academy of Sciences Guide for the Care and Use of Laboratory Animals.

### Study participants and tissue collection protocol

We studied surgical specimens obtained from patients undergoing total nephrectomy at the University of Texas Southwestern Medical Center and affiliated hospitals between 2007 and 2012. Included in the study were patients older than 21 years, of either gender and of any race/ethnicity, undergoing nephrectomy as first-line therapy for unilateral renal cell carcinoma. Race/ethnicity was self-reported. Exclusion criteria were serum creatinine  $\geq 1.5$  mg/dL, proteinuria, treatment with insulin or thiazolidinediones, genetic diseases of the kidney, inborn defects of lipid metabolism, and a history of recurrent urinary tract infections. None of the study participants were alcohol abusers. After nephrectomy, an experienced surgical pathologist dissected 1–3 separate, 0.1–1 cm<sup>3</sup> normal kidney cortex samples from each kidney, away from the tumor. Patients with no normal kidney cortex upon pathological examination of the surgical specimen were excluded from the study. Tissue samples were immediately frozen in liquid nitrogen and stored at  $-80^{\circ}\text{C}$  for biochemical measurement of triglycerides. For 29 subjects from which 2 or more samples were available, one sample was fixed in 4% paraformaldehyde, cryosectioned and stained for lipids using Oil Red O on the same day.

### Lipid measurements and tissue lipid staining

Biochemical measurement of kidney cortex triglycerides and Oil Red O lipid staining were performed as previously described [17]. Briefly, frozen tissue samples were homogenized using a Polytron (Brinkmann Instruments, Westbury, NY) in 300 mM mannitol, 18 mM HEPES and 5 mM EGTA (pH 7.5), and lipids were extracted by the method of Folch *et al.* [28]. Total triglyceride content was quantified using a triglyceride colorimetric assay kit (Sigma, St. Louis, MO) according to the method of Danno *et al.* [29]. Measurements from each tissue sample were performed in triplicate, with mean triglyceride values for each subject included in further analyses.

For lipid staining, 4  $\mu\text{m}$  tissue sections were rinsed with distilled deionized water, rinsed briefly with 60% isopropanol, stained with Oil Red O for 1 hour, and then subjected to standard hematoxylin staining and mounted on glass slides. Quantitative assessment of Oil Red O staining was performed in a blinded fashion by two independent investigators using the color deconvolution method of Ruifrock and Johnston [30] and the National Institutes of Health ImageJ software [31].

Tissue ceramides were measured in frozen tissue samples by the Mouse Metabolic Phenotyping Core at UT Southwestern Medical Center using high performance liquid chromatography-electrospray ionization-tandem mass spectrometry (HPLC-ESI-MS/MS), on a Shimadzu Prominence HPLC system coupled to an API 5000 LC-MS/MS mass spectrometer (ABSCIEX, Framingham, MA) equipped with a Turbo VTM electrospray ionization source operated in positive mode. Quantitative analysis of ceramides was achieved using selective reaction monitoring scan mode, with the concentration of each analyte determined according to calibration curves using peak-area ratio of analyte vs. corresponding internal standard. Calibration curves were generated using serial dilutions of ceramide standards (Avanti Polar Lipids, Alabaster, AL).

### Animals

Nine Zucker ZDF (fa/fa) rats, 7–10 months of age, and eight age-matched lean wild-type (+/+) rats, were a gift from Dr. Roger Unger (Touchstone Center for Diabetes Research, UT Southwestern Medical Center). Rats were fed standard chow (Harlan Teklad, Madison, WI) ad libitum and had free access to water. Euthanasia was performed by exsanguination under anesthesia with ketamine-xylazine-acepromazine (100, 10, and 1 mg/kg intraperitoneally). Kidneys were dissected on ice, and cortical samples were frozen in liquid nitrogen and stored at  $-80^{\circ}\text{C}$  for lipid measurements.

### Statistical analysis

For continuous variables, one-way analysis of variance with orthogonal linear contrasts was used to assess the trend over the kidney cortex triglyceride content tertiles. Adjustments for potential confounding variables were made with analysis of covariance models. Categorical variables were analyzed with the Cochran-Armitage trend test. Correlations were evaluated with Spearman rank-order correlation coefficients. A two-sided  $P$  value  $< 0.05$  was considered statistically significant. Analyses were performed with SAS v9.3 (SAS Institute, Cary, NC).

## Results

### Kidney cortex triglyceride content and characteristics of the study population

Triglyceride content was measured biochemically in non-cancerous kidney cortex samples obtained from 54 patients undergoing total nephrectomy. Selected demographic characteristics of the study population are presented in **Table 1**, with further stratification by tertiles of cortical triglyceride content. Body mass index (BMI) increased across tertiles of increasing kidney cortex triglyceride, and there was a significant positive correlation between triglycerides and BMI analyzed as continuous variables (**Figure 1**). Patients with higher renal cortical triglyceride content tended to be younger in the unadjusted analysis, but only BMI was a significant predictor of kidney triglyceride content ( $P = 0.003$ ) in a multivariable analysis including age and BMI as covariates. There were also no statistically significant differences in tertile distribution by gender or race/ethnicity, though women and minorities were numerically over-represented in the highest tertile (**Table 1**).

Serum creatinine, estimated glomerular filtration rate (eGFR), serum lipids (with and without adjustment for the use of antidiabetic medications) and diagnosed hypertension were not different across tertiles of kidney cortex triglyceride content (**Table 2**). We noted a borderline significant association between higher renal cortical triglyceride content and documented type 2

**Table 1.** Demographic and anthropometric characteristics.

|                                           | Overall cohort (N = 54) | Tertile 1 (N = 18) | Tertile 2 (N = 19) | Tertile 3 (N = 17) | P <sub>trend</sub> | P for tertile 1 vs. 3 |
|-------------------------------------------|-------------------------|--------------------|--------------------|--------------------|--------------------|-----------------------|
| <b>Body mass index,* kg/m<sup>2</sup></b> | 27.8 (24.9, 32.2)       | 26.7 (24.2, 29.1)  | 27.2 (24.8, 32.8)  | 30.0 (26.5, 33.7)  | 0.06               | 0.04                  |
| <b>Age</b>                                | 65 (56, 71)             | 66 (60, 71)        | 66 (58, 74)        | 59 (50, 64)        | 0.07               | 0.06                  |
| <b>Gender</b>                             |                         |                    |                    |                    | 0.41               | 0.41                  |
| Female                                    | 19 (35.2%)              | 6 (33.3%)          | 5 (26.3%)          | 8 (47.1%)          |                    |                       |
| Male                                      | 35 (64.8%)              | 12 (66.7%)         | 14 (73.7%)         | 9 (52.9%)          |                    |                       |
| <b>Race/ethnicity<sup>†</sup></b>         |                         |                    |                    |                    | 0.61               | 0.63                  |
| Black                                     | 4 (7.4%)                | 1 (5.6%)           | 0                  | 3 (17.6%)          |                    |                       |
| Hispanic                                  | 3 (5.6%)                | 1 (5.6%)           | 1 (5.3%)           | 1 (5.9%)           |                    |                       |
| Native American                           | 1 (1.9%)                | 0                  | 0                  | 1 (5.9%)           |                    |                       |
| White                                     | 43 (79.6%)              | 14 (77.8%)         | 17 (89.5%)         | 12 (70.6%)         |                    |                       |
| Unknown                                   | 3 (5.6%)                | 2 (11.1%)          | 1 (5.3%)           | 0                  |                    |                       |

Data are presented as median (25<sup>th</sup>, 75<sup>th</sup> percentiles) or number of subjects (percentage) for the overall study population, as well as stratified by tertiles of renal cortical triglyceride content.

\* Adjusted for body mass index.

<sup>†</sup> Because of rounding, not all percentages for race/ethnicity add up to exactly 100%.

doi:10.1371/journal.pone.0101285.t001

diabetes in unadjusted analyses, but statistical significance was not upheld after adjustment for BMI.

### Localization of triglyceride droplets

Triglyceride localization within kidney structures was examined in a blinded fashion by two investigators using Oil Red O staining of lipid droplets followed by computerized color deconvolution, in a subset of 29 subjects for which fixed tissue was available. Of these, 19 subjects had detectable Oil Red O staining. In spite of inter-individual variability, generally more lipid droplets were detected in samples from individuals with higher BMI (**Figure 2A**). Lipid droplets were predominantly localized in tubular cells, mostly in proximal tubules, and to a lesser extent within glomeruli and in the interstitium (**Figures 2B and 2C**). Of note, even in samples with high triglyceride content by biochemistry, lipid droplets detectable by Oil Red O staining and optical microscopy had a relatively sparse distribution, likely because only larger droplets can be visualized using this technique [32].

### Kidney cortex ceramide content

Kidney cortex ceramide content was measured retrospectively in samples from a subset of 14 patients with available tissue stored at  $-80^{\circ}\text{C}$ . The abundance of 16 common ceramide species in individual study subjects is shown in **Figure 3A**. We noted an inverse correlation trend between tissue triglycerides and several ceramides, with ceramide 16:0 reaching statistical significance ( $R = -0.61$ ,  $P = 0.02$ ). As shown in **Figure 3B**, within-sample molar sums of all measured ceramides were significantly and inversely correlated with triglyceride content. In spite of the positive correlation between triglycerides and BMI in the overall study population, there was no detectable relationship between BMI and individual ceramides or total ceramide content in the subset of subjects with measured renal ceramide content.

In an effort to further explore the significance of ceramides in relationship with renal lipid accumulation, we also measured ceramide content in obese Zucker diabetic fatty (ZDF) rats and lean age-matched controls. In spite of much higher triglyceride content in the kidney cortex of ZDF versus lean rats, there was no difference in total ceramides between groups (**Figure 3C**), and no relationship between total ceramides and triglyceride content.

## Discussion

### Key findings and interpretation

There are several key findings from this study of normal kidney surgical specimens obtained from 54 patients undergoing nephrectomy. There was a modest but statistically robust correlation between body mass index and total kidney cortex triglyceride content, suggesting that renal lipid accumulation occurs in humans with increasing body size. Lipid droplets detectable by conventional staining were primarily localized within epithelial cells of the proximal tubule, and to a lesser extent within glomeruli, suggesting that lipid accumulation and lipotoxicity may interfere with the normal physiology of these structures. Finally, evaluation of kidney ceramides in humans and rodents suggested that lipid accumula-

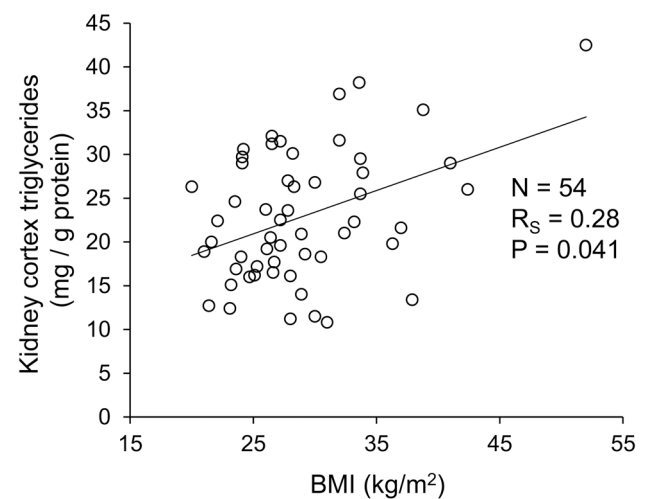

**Figure 1. Kidney cortex triglyceride content and relationship with body mass index (BMI).** Nephrectomy cortex samples were obtained from 54 patients with serum creatinine  $<1.5$  mg/dL and no proteinuria. All surgical specimens were dissected by experienced clinical pathologists and confirmed to be healthy, away from the tumor.  $R_s$ , Spearman rank-order correlation coefficient. doi:10.1371/journal.pone.0101285.g001

**Table 2.** Biochemical and clinical characteristics.

|                                                 | Overall cohort | Tertile 1      | Tertile 2      | Tertile 3      | P <sub>trend</sub>        | P for tertile 1 vs. 3     |
|-------------------------------------------------|----------------|----------------|----------------|----------------|---------------------------|---------------------------|
| <b>Creatinine</b> (mg/dL)                       | 1.0 (0.8, 1.2) | 1.0 (0.8, 1.2) | 1.0 (0.9, 1.1) | 0.9 (0.7, 1.3) | 0.62                      | 0.82                      |
| <b>eGFR*</b> (ml/min/1.73 m <sup>2</sup> )      | 79 (62, 92)    | 74 (61, 98)    | 81 (67, 90)    | 75 (61, 88)    | 0.64                      | 0.85                      |
| <b>Triglycerides</b> (mg/dL) <sup>†</sup>       | 132 (96, 195)  | 132 (95, 150)  | 154 (93, 232)  | 125 (101, 234) | 0.47                      | 0.52                      |
| <b>Total Cholesterol</b> (mg/dL) <sup>†</sup>   | 171 (137, 200) | 190 (144, 194) | 180 (135, 214) | 153 (135, 179) | 0.35                      | 0.26                      |
| <b>HDL-Cholesterol</b> (mg/dL) <sup>†</sup>     | 39 (34, 49)    | 44 (34, 51)    | 36 (31, 45)    | 39 (35, 47)    | 0.61                      | 0.56                      |
| <b>LDL-Cholesterol</b> (mg/dL) <sup>†</sup>     | 95 (76, 117)   | 106 (90, 119)  | 97 (79, 128)   | 85 (65, 96)    | 0.15 (0.58 <sup>‡</sup> ) | 0.10 (0.24 <sup>‡</sup> ) |
| <b>Antidyslipidemic medications<sup>‡</sup></b> | 13 (31.7%)     | 2 (18.2%)      | 6 (35.3%)      | 5 (29.4%)      | 0.30                      | 0.28                      |
| <b>Diabetes<sup>§</sup></b>                     | 12 (22.2%)     | 1 (5.6%)       | 6 (31.6%)      | 5 (29.4%)      | 0.09 (0.24 <sup>#</sup> ) | 0.06 (0.12 <sup>#</sup> ) |
| <b>Hypertension</b>                             | 35 (64.8%)     | 14 (77.8%)     | 11 (57.9%)     | 10 (58.8%)     | 0.24                      | 0.23                      |

Data are presented as median (25<sup>th</sup>, 75<sup>th</sup> percentiles) or number of subjects (percentage) for the overall study population, as well as stratified by tertiles of renal cortical triglyceride content.

\* eGFR was calculated using the CKD-EPI formula, [http://www.kidney.org/professionals/kdoqi/gfr\\_calculator.cfm](http://www.kidney.org/professionals/kdoqi/gfr_calculator.cfm).

<sup>†</sup>Lipid values were available for 34 of the 54 study participants (13, 10 and 11 respectively in the 3 tertiles).

<sup>‡</sup>Antidyslipidemic medications included statins in 11 patients, statin combined with cholesterol absorption inhibitor in 1 patient, and fibrate in 1 patient.

<sup>§</sup>Adjusted for the use of antidyslipidemic medications.

<sup>||</sup>All type 2 diabetes.

Of these, 4 were taking metformin, 3 sulfonylurea (glipizide or glyburide), one metformin+glimepiride, and 4 were managed with lifestyle intervention alone.

<sup>#</sup>Adjusted for body mass index.

doi:10.1371/journal.pone.0101285.t002

tion in the kidney may not associate with lipotoxicity via the ceramide pathway.

### Obesity and triglyceride accumulation in non-adipose tissues

Lipid accumulation with increasing BMI has been described in multiple non-adipose tissues, including the liver [21,23], pancreas [22], myocardium [23] and skeletal muscle [20]. With some exceptions, such as the “athlete’s paradox” of high intramuscular lipid associated with marked insulin sensitivity in endurance-trained athletes [33], lipid accumulation has been associated with lipotoxicity and organ dysfunction [24–27].

In the human kidney, various patterns of lipid accumulation have been described in patients with genetic defects of lipid metabolism, including familial dysbetalipoproteinemia [34], lecithin-cholesterol acyltransferase deficiency [35], lipoprotein glomerulopathy [36] and alpha-galactosidase A deficiency (Fabry’s disease) [37], as well as in patients with acquired conditions such as hypertensive nephrosclerosis [38], focal segmental glomerulosclerosis [39], minimal change disease with massive proteinuria [40] and hepatorenal syndrome [41]. However, whether lipid accumulation occurs with increasing BMI was not known prior to the present study.

As the general definition of steatosis is “any abnormal accumulation of triglycerides within parenchymal cells” [42], our data suggest that obesity may be associated with renal steatosis, although absolute triglyceride levels in the steatotic kidney are much lower than in the steatotic liver [43].

### Localization of lipid droplets and pathophysiological implications

A large number of animal studies using genetic, pharmacologic or dietary manipulations have shown that renal lipid accumulation can occur both in glomeruli and in tubule cells, primarily in proximal tubules, with some variations between genetic strains and experimental models (reviewed in [9]). Lipid accumulation in glomeruli as well as in tubule cells has been postulated to contribute to the pathogenesis of kidney disease in animal models

of progressive renal injury [8,9]. In addition, prior *in vivo* and *in vitro* studies from our group have proposed a causal relationship between lipid accumulation in the proximal tubule and altered renal acidification, which can increase uric acid stone risk [17,18]. It is absolutely imperative to determine whether these studies are relevant for human pathophysiology. One *sine qua non* condition is detectability of lipid accumulation within the respective renal structures in at-risk individuals. Our findings that kidney cortex triglycerides are localized in both tubule cells and in glomeruli, and track with increasing BMI, suggest that renal lipid accumulation could play a role in obesity-related kidney disease and nephrolithiasis risk.

### Lipid droplets, lipotoxicity and the role of ceramides

Intracellular lipid droplets are not static fat depots, but dynamic and highly regulated organelles with important normal functions in cellular energy storage and metabolism [44]. When net delivery of fatty acids to non-adipose cells exceeds cellular energy needs or beta-oxidative capacity, one key mechanism of defense against lipotoxicity is the storage of excess fatty acids as triglycerides in lipid droplets. It is thus important to note that triglyceride accumulation is not considered harmful *per se*, but is instead a quantifiable marker of a disturbed balance between fatty acid supply and utilization [8,9,45]. Excess fatty acids that are not beta-oxidized or incorporated in triglycerides enter alternative metabolic pathways, resulting in increased cellular content of potentially lipotoxic metabolites, with ceramides as a much touted candidate [8,9,45]. This model is compatible with the negative correlation between renal triglyceride and ceramide levels in a subset of samples from our study, suggesting that effective incorporation of excess fatty acids into triglycerides may protect against ceramide-induced renal lipotoxicity.

Importantly, there was no detectable relationship between ceramide levels and BMI in our dataset. We postulate that our data on triglycerides reflect a general state of obesity-associated renal fatty acid oversupply, while our data on ceramides reflect inter-individual differences in the metabolic fates of excess fatty acids in the kidney due to factors unrelated to BMI. These differences could potentially contribute to clinical variability, with

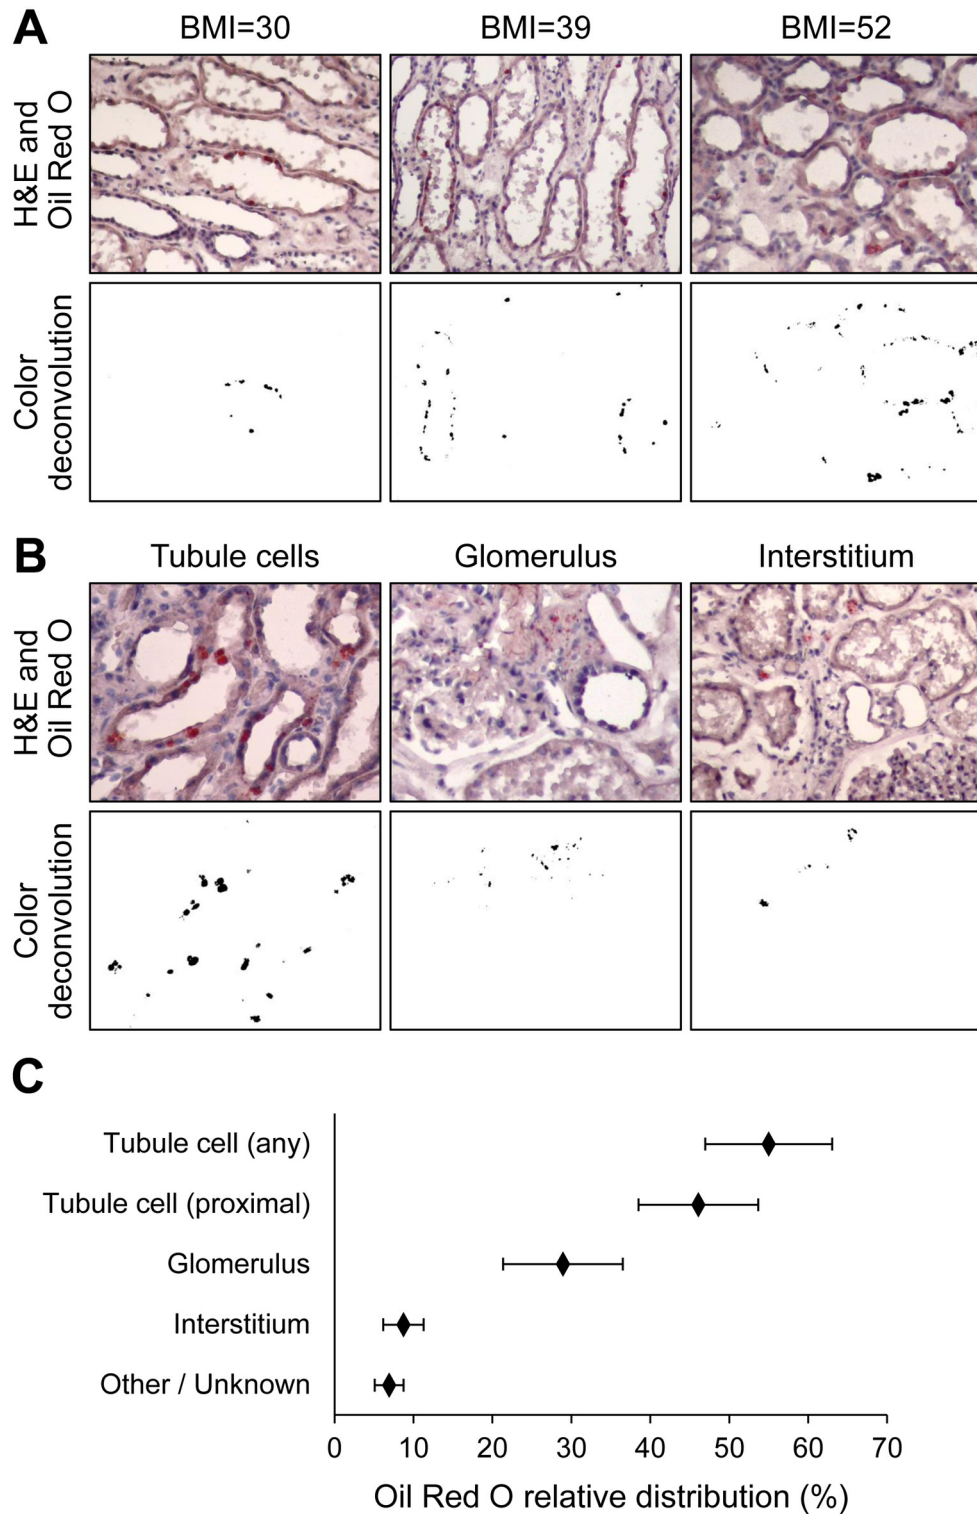

**Figure 2. Lipid staining.** Kidney cortex sections were stained with Oil Red O and standard hematoxylin to visualize lipid localization within renal structures. After image acquisition, a computer-based color deconvolution and thresholding algorithm was used to separately visualize and quantify Oil Red O staining, with the original image serving as reference for the manual assignment of lipid staining to discrete structures (i.e. tubule cells, glomeruli, interstitium, other). A. Oil Red O staining was noted predominantly in proximal tubule cells, and generally increased with increasing body mass index (BMI). B. Examples of the localization of lipids within tubule cells, glomeruli and interstitium. C. Relative distribution of lipids within kidney structures based on Oil Red O staining quantified by color deconvolution in 29 study participants with available fixed tissue. Whiskers represent 95% confidence intervals.

doi:10.1371/journal.pone.0101285.g002



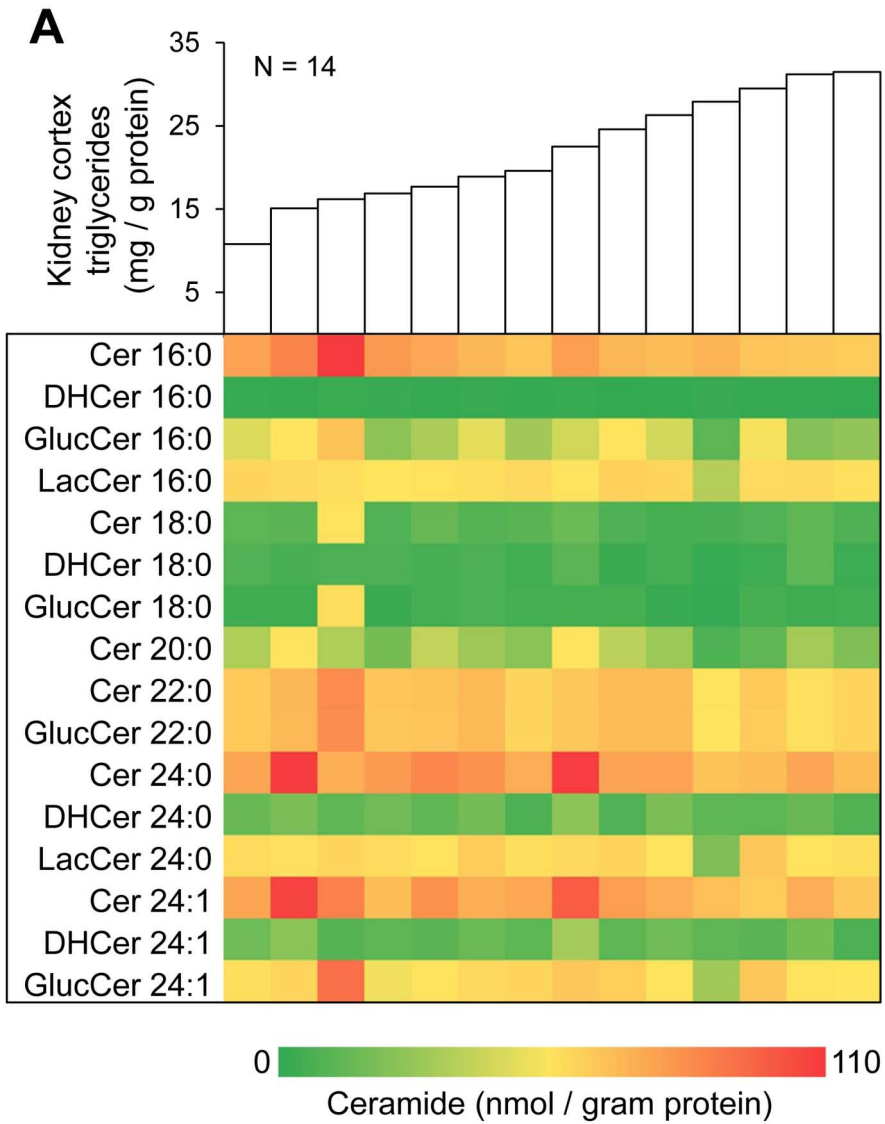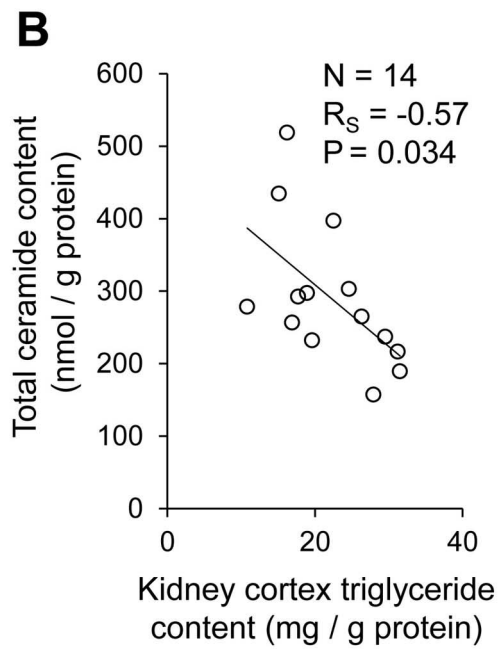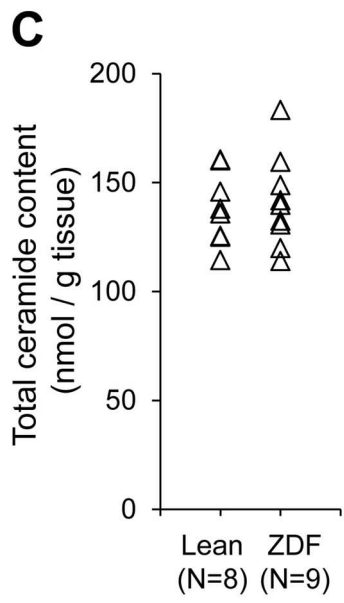

**Figure 3. Kidney cortex ceramide content and relationship with triglycerides.** Sixteen common ceramide species (Cer, ceramide; GlucCer, glucosylceramide; LacCer, lactosylceramide; DHCer, dihydroceramide) were measured by high performance liquid chromatography-electrospray ionization-tandem mass spectrometry (HPLC-ESI-MS/MS) in kidney cortex samples previously frozen at  $-80^{\circ}\text{C}$ . A. The abundance of each ceramide species in human kidney cortex samples with increasing triglyceride content. B. Relationship between total ceramide content (molar sum of all measured ceramides) and triglyceride content in human kidney cortex samples.  $R_s$ , Spearman rank-order correlation coefficient. C. Total ceramide content in kidney cortex samples from Zucker diabetic fatty (ZDF) and lean control rats. doi:10.1371/journal.pone.0101285.g003

obesity-related kidney disease and nephrolithiasis risk not uniformly manifested in the general population. However, while ceramides have been implicated in lipotoxicity in other organs, little is known about their role in the kidney, and the potential contribution of other lipid metabolites to renal lipotoxicity is also unclear [8,24,46,47].

### Renal ceramides in Zucker diabetic fatty rats

To further explore the potential role of ceramides in renal pathophysiology, while controlling for the genetic and environmental heterogeneity inherent in human subject research, we studied a rodent model in which renal triglyceride accumulation has been linked with surrogate functional markers of uric acid stone risk, including data showing that reduction of triglyceride accumulation with a PPAR $\gamma$  agonist reversed the functional defects [18,19]. There were no differences in total kidney cortex ceramide content between ZDF rats and lean control rats, suggesting that renal dysfunction in ZDF rats is not attributable to ceramide-induced lipotoxicity. Other lipid metabolites may contribute to renal lipotoxicity in this animal model [8,24,46,47].

### Strengths and Limitations

Key strengths of the present study include the quantitation of triglycerides by a combination of direct biochemical and histological methods and the assessment of a relatively large number of samples from patients with a wide range of BMI. While most recent studies in humans have evaluated triglyceride content in various tissues indirectly by  $^1\text{H}$  magnetic resonance spectroscopy (MRS) [20–23], direct biochemical quantitation of triglycerides, as used in the present study, remains the gold-standard [48]. Despite widespread use in the heart, skeletal muscle, liver and pancreas [49], MRS-based measurement of triglycerides in the kidney has only recently been reported by Hammer *et al.* [50]. However, the technique does not have adequate reliability in our hands. We and our collaborators have performed careful measurements including respiratory motion compensation, but these yielded borderline signal-to-noise ratios and unacceptable intra-assay variation (unpublished data). This is largely attributable to the much lower fat content in the kidney, even in pathologic states, compared with other tissues in which this technique is established. The study of Hammer *et al.* found mean triglyceride-to-water peak ratios in the renal parenchyma less than 0.5%, with a reported intra-assay coefficient of variation (CV) of 27% in optimal conditions [50]. For comparison, triglyceride peak ratios

as high as 40% have been reported in steatotic liver, with CV = 8.5% [51].

The study also has important limitations. Our cohort of patients undergoing nephrectomy for renal tumors is not representative of the general population. Measures of adiposity other than BMI, such as waist circumference, waist to hip ratio, or truncal fat content determined by dual energy X-ray absorptiometry, were not available. Finally, because of limited tissue availability, we could only perform Oil Red O staining and ceramide measurements in subsets of the study population.

### Conclusions

This is the first demonstration of obesity-related triglyceride accumulation (steatosis) in the human kidney. Even though the amount of lipid is not large and the distribution is sporadic, the predominant localization of lipid droplets appears to be within proximal tubule cells, and to a lesser extent within glomeruli. Triglyceride accumulation in individuals with high BMI is likely a marker of renal fatty acid oversupply, as well as a cellular defense mechanism against the accumulation of potentially toxic metabolites, as suggested by our quantitation of 16 common ceramide species. This study supports the potential association between renal lipid accumulation and obesity-related kidney disease and nephrolithiasis risk.

### Acknowledgments

The authors are grateful for the skilled assistance of Carolyn Griffith, RN, Elaine Isaming, RN (clinical research coordinators), Adrien Jump, Anthony Nguyen, Hillary Thompson, Sun Park (technical staff), John Poindexter (database manager) and to the many staff members in the Departments of Urology and Pathology at UT Southwestern and affiliated hospitals who facilitated the timely transfer of surgical specimens for this study. Special thanks go to Dr. Roger Unger and Dr. Connie Hsia for generously providing ZDF and control rats, to Dr. Lili Wu and Dr. Priya Ravikumar for help with animal experiments, to Dr. Ruth Gordillo for help with the quantitation of ceramides by LC-ESI-MS/MS, and to Dr. Philipp Scherer for helpful discussions.

### Author Contributions

Conceived and designed the experiments: IAB KS OWM. Performed the experiments: IAB JZ TRR. Analyzed the data: IAB YL JZ TRR JTR BA KS OWM. Wrote the paper: IAB. Revised the article for important intellectual content: IAB YL JZ TRR JTR BA KS OWM. Approved the final version: IAB YL JZ TRR JTR BA KS OWM.

### References

- European Commission's European Statistics (Eurostat) website: Overweight and obesity - BMI statistics - Statistics Explained. Available: [http://epp.eurostat.ec.europa.eu/statistics\\_explained/index.php/Overweight\\_and\\_obesity\\_-\\_BMI\\_statistics#](http://epp.eurostat.ec.europa.eu/statistics_explained/index.php/Overweight_and_obesity_-_BMI_statistics#) Accessed 2014 June 7.
- Ogden CL, Carroll MD, Kit BK, Flegal KM (2012) Prevalence of obesity in the United States, 2009–2010. NCHS data brief, no 82. Hyattsville, MD: National Center for Health Statistics. Available on the Centers for Disease Control and Prevention website: <http://www.cdc.gov/nchs/data/databriefs/db82.pdf> Accessed 2014 June 7.
- World Health Organization website: Fact sheet N°311 - Obesity and overweight. Available: <http://www.who.int/mediacentre/factsheets/fs311/en/> Accessed 2014 June 7.
- Janssen I, Katzmarzyk PT, Ross R (2004) Waist circumference and not body mass index explains obesity-related health risk. *Am J Clin Nutr* 79: 379–384.
- Fox CS, Larson MG, Leip EP, Culleton B, Wilson PW, et al. (2004) Predictors of new-onset kidney disease in a community-based population. *JAMA* 291: 844–850.
- Vivante A, Golan E, Tzur D, Leiba A, Tirosh A, et al. (2012) Body mass index in 1.2 million adolescents and risk for end-stage renal disease. *Arch Intern Med* 172: 1644–1650.
- Hsu CY, McCulloch CE, Iribarren C, Darbinian J, Go AS (2006) Body mass index and risk for end-stage renal disease. *Ann Intern Med* 144: 21–28.
- Weinberg JM (2006) Lipotoxicity. *Kidney Int* 70: 1560–1566.
- Bobulescu IA (2010) Renal lipid metabolism and lipotoxicity. *Curr Opin Nephrol Hypertens* 19: 393–402.

10. Zoccali C, Mallamaci F (2011) Adiponectin and leptin in chronic kidney disease: causal factors or mere risk markers? *J Ren Nutr* 21: 87–91.
11. Wickman C, Kramer H (2013) Obesity and kidney disease: potential mechanisms. *Semin Nephrol* 33: 14–22.
12. Taylor EN, Stampfer MJ, Curhan GC (2005) Obesity, weight gain, and the risk of kidney stones. *JAMA* 293: 455–462.
13. Scales CD, Jr., Smith AC, Hanley JM, Saigal CS, Urologic Diseases in America P (2012) Prevalence of kidney stones in the United States. *Eur Urol* 62: 160–165.
14. Daudon M, Lacour B, Jungers P (2006) Influence of body size on urinary stone composition in men and women. *Urol Res* 34: 193–199.
15. Maalouf NM, Sakhaee K, Parks JH, Coe FL, Adams-Huet B, et al. (2004) Association of urinary pH with body weight in nephrolithiasis. *Kidney Int* 65: 1422–1425.
16. Sakhaee K, Maalouf NM (2008) Metabolic syndrome and uric acid nephrolithiasis. *Semin Nephrol* 28: 174–180.
17. Bobulescu IA, Dubree M, Zhang J, McLeroy P, Moe OW (2008) Effect of renal lipid accumulation on proximal tubule Na<sup>+</sup>/H<sup>+</sup> exchange and ammonium secretion. *Am J Physiol Renal Physiol* 294: F1315–F1322.
18. Bobulescu IA, Dubree M, Zhang J, McLeroy P, Moe OW (2009) Reduction of renal triglyceride accumulation: effects on proximal tubule Na<sup>+</sup>/H<sup>+</sup> exchange and urinary acidification. *Am J Physiol Renal Physiol* 297: F1419–F1426.
19. Bobulescu IA, Dubree M, Zhang J, Moe OW (2007) Effect of lipid accumulation on renal proximal tubule Na<sup>+</sup>/H<sup>+</sup> exchange and NH<sub>4</sub><sup>+</sup> secretion. *Am J Physiol Renal Physiol*: submitted.
20. Sinha R, Dufour S, Petersen KF, LeBon V, Enoksson S, et al. (2002) Assessment of skeletal muscle triglyceride content by (1)H nuclear magnetic resonance spectroscopy in lean and obese adolescents: relationships to insulin sensitivity, total body fat, and central adiposity. *Diabetes* 51: 1022–1027.
21. Thomas EL, Hamilton G, Patel N, O'Dwyer R, Dore CJ, et al. (2005) Hepatic triglyceride content and its relation to body adiposity: a magnetic resonance imaging and proton magnetic resonance spectroscopy study. *Gut* 54: 122–127.
22. Lingvay I, Esser V, Legendre JL, Price AL, Wertz KM, et al. (2009) Noninvasive quantification of pancreatic fat in humans. *J Clin Endocrinol Metab* 94: 4070–4076.
23. Graner M, Siren R, Nyman K, Lundbom J, Hakkarainen A, et al. (2013) Cardiac steatosis associates with visceral obesity in nondiabetic obese men. *J Clin Endocrinol Metab* 98: 1189–1197.
24. Unger RH, Clark GO, Scherer PE, Orci L (2010) Lipid homeostasis, lipotoxicity and the metabolic syndrome. *Biochim Biophys Acta* 1801: 209–214.
25. Wende AR, Abel ED (2010) Lipotoxicity in the heart. *Biochim Biophys Acta* 1801: 311–319.
26. Muoio DM (2010) Intramuscular triacylglycerol and insulin resistance: Guilty as charged or wrongly accused? *Biochim Biophys Acta* 1801: 281–288.
27. Suganami T, Tanaka M, Ogawa Y (2012) Adipose tissue inflammation and ectopic lipid accumulation. *Endocr J* 59: 849–857.
28. Folch J, Lees M, Sloane Stanley GH (1957) A simple method for the isolation and purification of total lipides from animal tissues. *J Biol Chem* 226: 497–509.
29. Danno H, Jincho Y, Budiyo S, Furukawa Y, Kimura S (1992) A simple enzymatic quantitative analysis of triglycerides in tissues. *J Nutr Sci Vitaminol (Tokyo)* 38: 517–521.
30. Ruifrok AC, Johnston DA (2001) Quantification of histochemical staining by color deconvolution. *Anal Quant Cytol Histol* 23: 291–299.
31. Rasband WS (1997–2007) ImageJ, U. S. National Institutes of Health, Bethesda, Maryland, USA. Available: <http://rsb.info.nih.gov/ij/> Accessed 2014 June 7.
32. Olofsson SO, Bostrom P, Andersson L, Rutberg M, Perman J, et al. (2009) Lipid droplets as dynamic organelles connecting storage and efflux of lipids. *Biochim Biophys Acta* 1791: 448–458.
33. Goodpaster BH, He J, Watkins S, Kelley DE (2001) Skeletal muscle lipid content and insulin resistance: evidence for a paradox in endurance-trained athletes. *J Clin Endocrinol Metab* 86: 5755–5761.
34. Balson KR, Niall JF, Best JD (1996) Glomerular lipid deposition and proteinuria in a patient with familial dysbetalipoproteinemia. *J Intern Med* 240: 157–159.
35. Gjone E (1981) Familial lecithin:cholesterol acyltransferase deficiency - a new metabolic disease with renal involvement. *Adv Nephrol Necker Hosp* 10: 167–185.
36. Sam R, Wu H, Yue L, Mazzone T, Schwartz MM, et al. (2006) Lipoprotein glomerulopathy: a new apolipoprotein E mutation with enhanced glomerular binding. *Am J Kidney Dis* 47: 539–548.
37. Gubler MC, Lenoir G, Grunfeld JP, Ulmann A, Droz D, et al. (1978) Early renal changes in hemizygous and heterozygous patients with Fabry's disease. *Kidney Int* 13: 223–235.
38. Druilhet RE, Overturf ML, Kirkendall WM (1978) Cortical and medullary lipids of normal and nephrosclerotic human kidney. *Int J Biochem* 9: 729–734.
39. Magil AB, Cohen AH (1989) Monocytes and focal glomerulosclerosis. *Lab Invest* 61: 404–409.
40. Jennette JC, Falk RJ (1990) Adult minimal change glomerulopathy with acute renal failure. *Am J Kidney Dis* 16: 432–437.
41. Hovig T, Blomhoff JP, Holme R, Flatmark A, Gjone E (1978) Plasma lipoprotein alterations and morphologic changes with lipid deposition in the kidney of patients with hepatorenal syndrome. *Lab Invest* 38: 540–549.
42. Kumar V, Abbas AK, Aster JC (2012) Robbins Basic Pathology. Philadelphia, PA: Elsevier Saunders.
43. Reddy JK, Rao MS (2006) Lipid metabolism and liver inflammation. II. Fatty liver disease and fatty acid oxidation. *Am J Physiol Gastrointest Liver Physiol* 290: G852–G858.
44. Greenberg AS, Coleman RA, Kraemer FB, McManaman JL, Obin MS, et al. (2011) The role of lipid droplets in metabolic disease in rodents and humans. *J Clin Invest* 121: 2102–2110.
45. Listenberger LL, Han X, Lewis SE, Cases S, Farese RV, Jr., et al. (2003) Triglyceride accumulation protects against fatty acid-induced lipotoxicity. *Proc Natl Acad Sci U S A* 100: 3077–3082.
46. Unger RH (2002) Lipotoxic diseases. *Annu Rev Med* 53: 319–336.
47. Samuel VT, Shulman GI (2012) Mechanisms for insulin resistance: common threads and missing links. *Cell* 148: 852–871.
48. Szczepaniak LS, Babcock EE, Schick F, Dobbins RL, Garg A, et al. (1999) Measurement of intracellular triglyceride stores by H spectroscopy: validation in vivo. *Am J Physiol* 276: E977–E989.
49. Thomas EL, Fitzpatrick JA, Malik SJ, Taylor-Robinson SD, Bell JD (2013) Whole body fat: Content and distribution. *Prog Nucl Magn Reson Spectrosc* 73: 56–80.
50. Hammer S, de Vries AP, de Heer P, Bizino MB, Wolterbeek R, et al. (2013) Metabolic imaging of human kidney triglyceride content: reproducibility of proton magnetic resonance spectroscopy. *PLoS One* 8: e62209.
51. Szczepaniak LS, Nurenberg P, Leonard D, Browning JD, Reingold JS, et al. (2005) Magnetic resonance spectroscopy to measure hepatic triglyceride content: prevalence of hepatic steatosis in the general population. *Am J Physiol Endocrinol Metab* 288: E462–E468.
